# Supplementary material
Source: MDPI journal article supplement (https://www.mdpi.com/2311-5637/9/7/661)
Supplement: s1 [file s1]

Table S1. Net heating values and total price of products at different ratios (w/w) of press cake used for butanol production and electricity generation via combustion

| Parameter                                          | Ratio of press cake for butanol production: electricity generation via combustion (w/w) |       |       |       |       |
|----------------------------------------------------|-----------------------------------------------------------------------------------------|-------|-------|-------|-------|
|                                                    | 100:0                                                                                   | 70:30 | 50:50 | 30:70 | 0:100 |
| Butanol production                                 |                                                                                         |       |       |       |       |
| Press cake (ton wet)                               | 1.53                                                                                    | 1.071 | 0.765 | 0.459 | 0     |
| Alkali-pretreated (ton dry)                        | 0.30                                                                                    | 0.21  | 0.15  | 0.09  | 0     |
| Butanol production (kg)                            | 10.20                                                                                   | 7.14  | 5.10  | 3.06  | 0     |
| LHV (MJ)                                           | 351                                                                                     | 246   | 175   | 105   | 0     |
| Fuel butanol (USD)                                 | 16                                                                                      | 11    | 8     | 5     | 0     |
| Chemical butanol (USD)                             | 225                                                                                     | 157   | 112   | 67    | 0     |
| Electricity generation via combustion              |                                                                                         |       |       |       |       |
| Press cake (ton wet)                               | 0                                                                                       | 0.459 | 0.765 | 1.071 | 1.53  |
| Net LHV (MJ)                                       | 0                                                                                       | 2831  | 4719  | 6606  | 9438  |
| Electricity generation (kWh)                       | 0                                                                                       | 260   | 433   | 606   | 865   |
| Price (USD)                                        | 0                                                                                       | 25    | 42    | 58    | 83    |
| Total price (electricity + fuel butanol) (USD)     | 16                                                                                      | 36    | 50    | 63    | 83    |
| Total price (electricity + chemical butanol) (USD) | 225                                                                                     | 182   | 154   | 126   | 83    |
